# Supplementary material
Source: publisher figshare collection journal article supplement (https://gsapubs.figshare.com/ndownloader/files/36414348)
Supplement: Supplementary file 1 [file 36414348]

**X-RAY DIFFRACTION DATA**

XRD spectra were collected using a Bruker D8 Advance Powder Diffractometer on powders ground to <60 μm in an agate planetary mill. Phase identification is performed automatically in Bruker’s DIFFRAC.EVA software.

Figure S1: XRD spectrum for Gotugjogv host rock (GOT-i)

Figure S2: XRD spectrum for Gotugjogv damage zone (GOT-xii)

Figure S3: XRD spectrum for Selatrad ultracataclasite (SEL-iii)

Figure S4: XRD spectrum for Gotugjogv zeolite vein (GOT-viii)

**SEM-EDS MINERAL MAPPING**

Chemical composition is mapped using a ZEISS Sigma 300 Field emission – analytical scanning electron microscope with 15 kV acceleration voltage and a beam aperture of 120 μm. We used two Bruker XFlash|60 EDS detectors positioned perpendicular to one another to prevent data shadowing effects. Automated mineralogy classifications were performed using ZEISS Mineralogic software with a 5 micron beam step size and 200 x magnification.

Figure S5: SEM mineral map for Gotugjogv host rock (GOT-i) with relatively unaltered wall rock on the right, and the area between the fractures on the left.

Figure S6: SEM mineral map for Gotugjogv damage zone (GOT-xii), amygdale at bottom right.

Figure S7: SEM mineral map for Gotugjogv brecciated cataclasite (GOT-xi)

Figure S8: SEM mineral map for Selatrad ultracataclasite (SEL-iii)

**UNINTERPRETED FIGURES**

(see paper for captions)

Figure 2

Figure 3

Figure 4

Figure 5

Figure 7

Figure 9

Figure 10

Figure 11

A new digital supplement provides XRD spectra and SEM-EDS mineral maps, as well as uninterpreted versions of the figures.

fig1_Faroes map_small.jpg

fig2_IBO map_small.jpg

fig3_GO map_small.jpg

fig4_GO litho_small.jpg

fig5_SE map_small.jpg

fig6_riedel paper.jpg

fig7_sec faults_small.jpg

fig8_fault rock tern_small.jpg

fig9_samples_small.jpg

fig10_TS scans_small.jpg

fig11_microstructures_small.jpg

fig12_model_small.jpg

fig13_perm&strength_small.jpg

supp-fig1_GO13_small.jpg

supp-fig2_GO21_small.jpg

supp-fig3_SE1_small.jpg

supp-fig4_GO23

supp-fig5_GO13_minmap

supp-fig6_GO21_minmap

supp-fig7_GO5-B_minmap

supp-fig8_SE1_minmap

fig2_IBO map_blank_small.jpg

fig3_GO map_blank_small.jpg

fig4_GO litho_blank_small.jpg

fig5_SE map_blank_small.jpg

fig7_sec faults_blank_small.jpg

fig9_samples_blank_small.jpg

fig10_TS scans_blank_small.jpg

fig11_microstructures_blank_small.jpg
